# Supplementary material for: Enzyme immobilization on silicate glass through simple adsorption of dendronized polymer–enzyme conjugates for localized enzymatic cascade reactions
Source: Royal Society of Chemistry journal article supplement (doi:10.1039/c5ra06268c), 2015-01-01
Supplement: c5ra06268c1.pdf [file c5ra06268c1.pdf]

## Supplementary Information

### Enzyme immobilization on silicate glass through simple adsorption of dendronized polymer-enzyme conjugates for localized enzymatic cascade reactions

Andreas Küchler,<sup>a</sup> Jozef Adamcik,<sup>b</sup> Raffaele Mezzenga,<sup>b</sup> A. Dieter Schlüter<sup>a</sup> and

Peter Walde<sup>\*,a</sup>

<sup>a</sup> Laboratory of Polymer Chemistry, Department of Materials, ETH Zürich, Vladimir-Prelog-Weg 5, 8093 Zürich, Switzerland

<sup>b</sup> Laboratory of Food & Soft Materials, Institute of Food, Nutrition and Health, Department of Health Sciences and Technology, ETH Zürich, Schmelzbergstrasse 9, 8092 Zürich, Switzerland

\*corresponding author: peter.walde@mat.ethz.ch

---

#### List of Figures

Figure S1 Spectrophotometric monitoring of *de*-PG2-BAH-HRP conjugation

Figure S2 Spectrophotometric monitoring of *de*-PG2-BAH-GOD conjugation

Figure S3 HRP activity calibration curve

Figure S4 GOD activity calibration curve

Figure S5 AFM analysis of microscopy glass coverslips

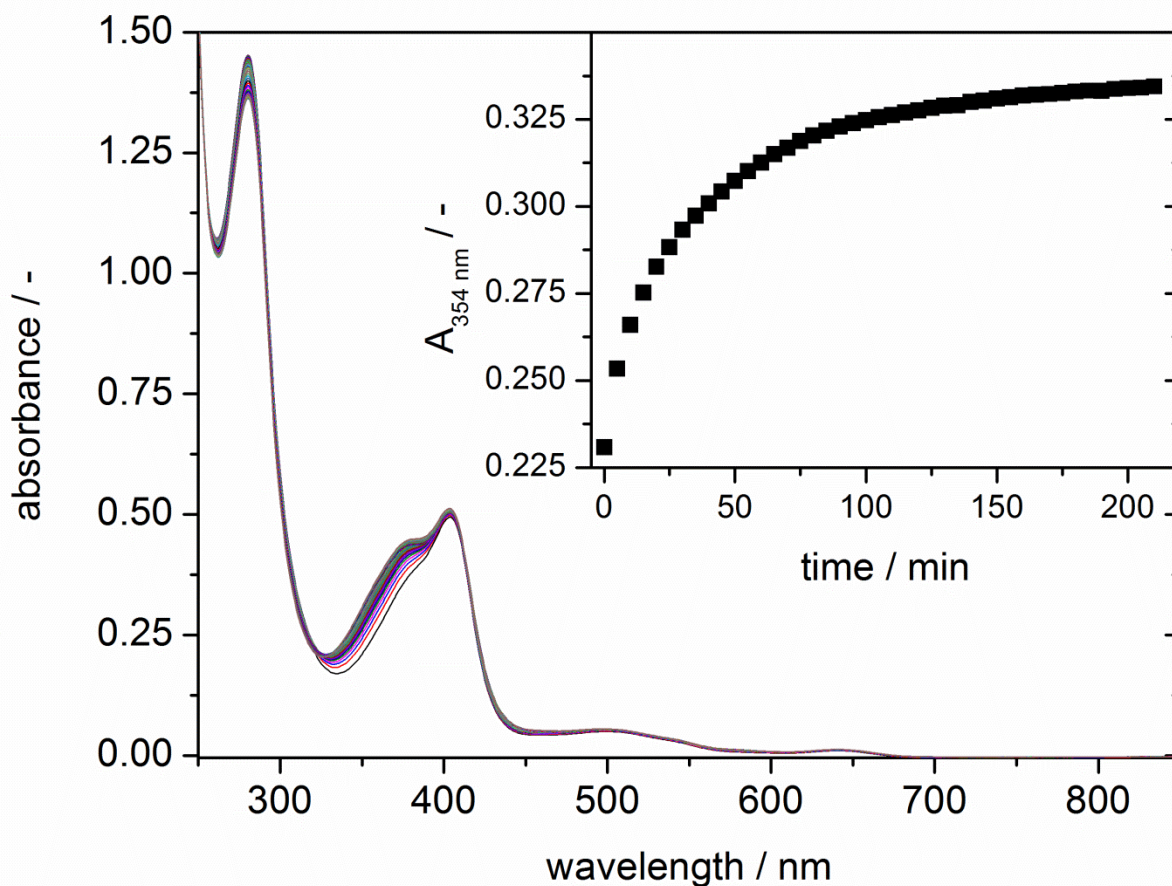

**Figure S1.** Continuous UV/vis-spectrophotometric monitoring of the formation of *de*-PG2-BAH-HRP at pH = 4.7 (reaction ④ in Fig. 1). In a quartz cuvette (0.1 cm path length, 0.35 mL) 205.9  $\mu$ L buffer-2, 32.6  $\mu$ L of *de*-PG2-HyNic (from a stock solution with a concentration of 690  $\mu$ M HyNic), 53.6  $\mu$ L HRP-4FB (from a stock solution with a concentration of 280  $\mu$ M 4FB), and 7.9  $\mu$ L aniline (from a 380 mM stock solution) were mixed. Immediately after mixing, recording of UV/vis spectra was started at an interval of 5 minutes. The inset shows the increasing absorbance at 354 nm which is characteristic for the BAH bond formed during the conjugation. The conjugate preparation was carried out several times with always the same conditions. As the concentrations of the stock solutions varied, the exact volumes were adjusted accordingly.

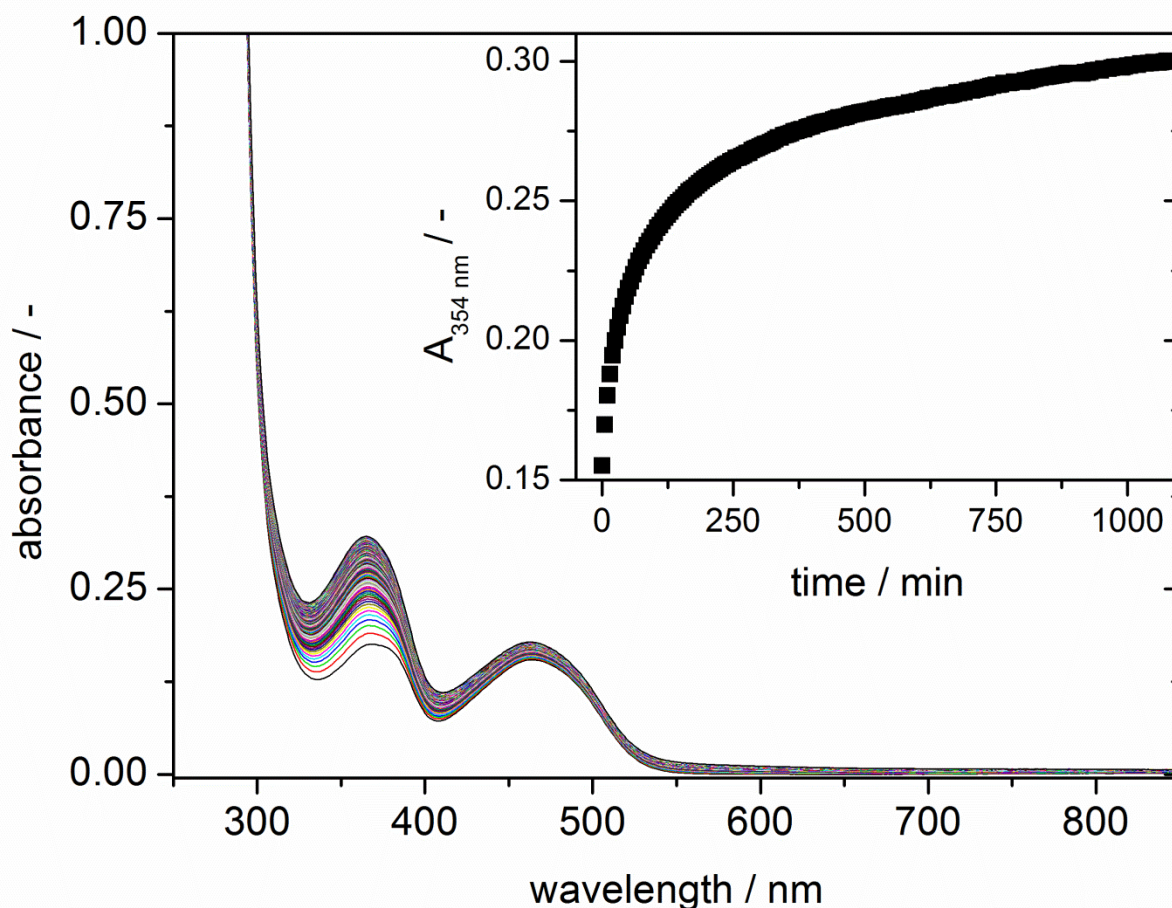

**Figure S2.** Continuous UV/vis-spectrophotometric monitoring of the formation of *de*-PG2-BAH-GOD at pH = 4.7 (reaction ⑤ in Fig. 1). In a quartz cuvette (0.1 cm path length, 0.35 mL) 215.6  $\mu\text{L}$  buffer-5, 67.7  $\mu\text{L}$  of *de*-PG2-HyNic (from a stock solution with a concentration of 388  $\mu\text{M}$  HyNic), and 66.8  $\mu\text{L}$  GOD-4FB (from a stock solution with a concentration of 262  $\mu\text{M}$  4FB) were mixed. Immediately after mixing, recording of UV/vis spectra was started at an interval of 5 minutes. The inset shows the increasing absorbance at 354 nm which is characteristic for the BAH bond formed during the conjugation. The conjugate preparation was carried out several times with always the same conditions. As the concentrations of the stock solutions varied, the exact volumes were adjusted accordingly.

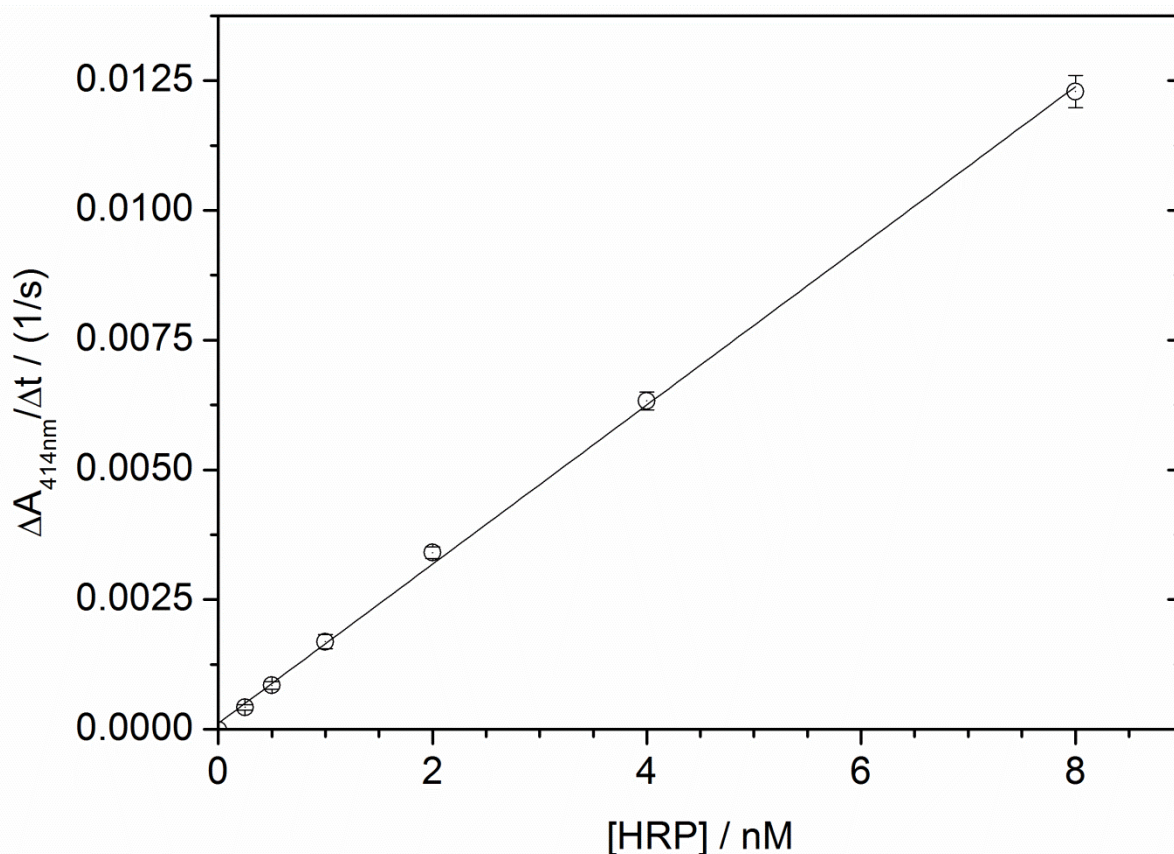

**Figure S3.** Calibration curve for the quantification of HRP activity at pH = 7.0. With known amounts of HRP in solution (0-8 nM), enzymatic oxidation of chromogenic ABTS<sup>2-</sup> (1 mM) with H<sub>2</sub>O<sub>2</sub> (0.2 mM) yielding ABTS<sup>•-</sup> was monitored by UV/vis spectrophotometry. The reaction rate, expressed as the increase in absorption at  $\lambda_{\text{max}} = 414$  nm per time, is linearly dependent on the enzyme concentration. Determination of the apparent concentration of immobilized HRP on glass surfaces was performed by correlating the enzymatic activity measured to the corresponding amount of HRP read from the calibration curve.

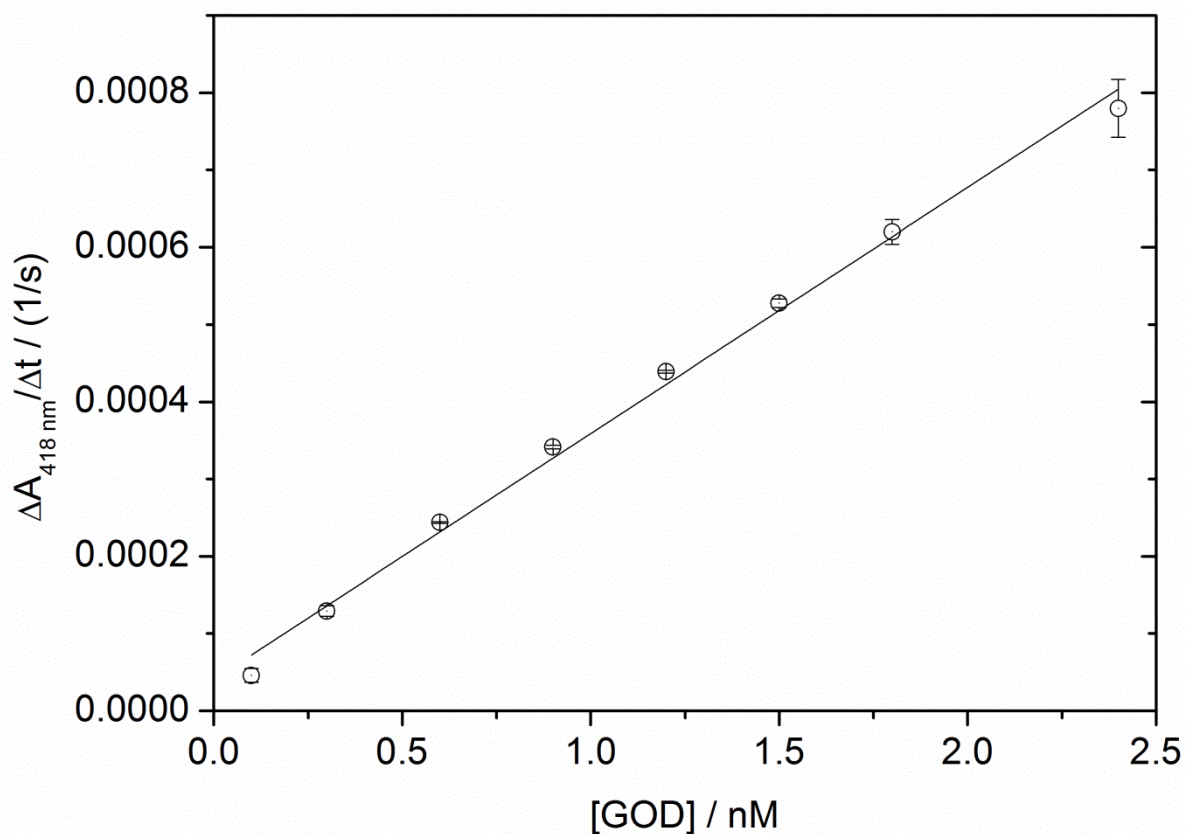

**Figure S4.** Calibration curve for the quantification of GOD activity at pH = 7.0. With known amounts of GOD in solution (0-2.4 nM), enzymatic oxidation of D-glucose (3.45 mM) by dissolved  $O_2$  yielding glucono- $\delta$ -lactone and  $H_2O_2$  was monitored exploiting a coupled HRP based assay for  $H_2O_2$  detection (2 nM HRP, 3.14 mM OPD, as described in the EXPERIMENTAL SECTION). Product formation was monitored by UV/vis spectrophotometry. The reaction rate, expressed as the increase in absorption at  $\lambda_{\text{max}} = 418 \text{ nm}$  per time, is linearly dependent on the enzyme concentration. Determination of the apparent concentration of immobilized GOD on glass surfaces was performed by correlating the enzymatic activity measured to the corresponding amount of GOD read from the calibration curve.

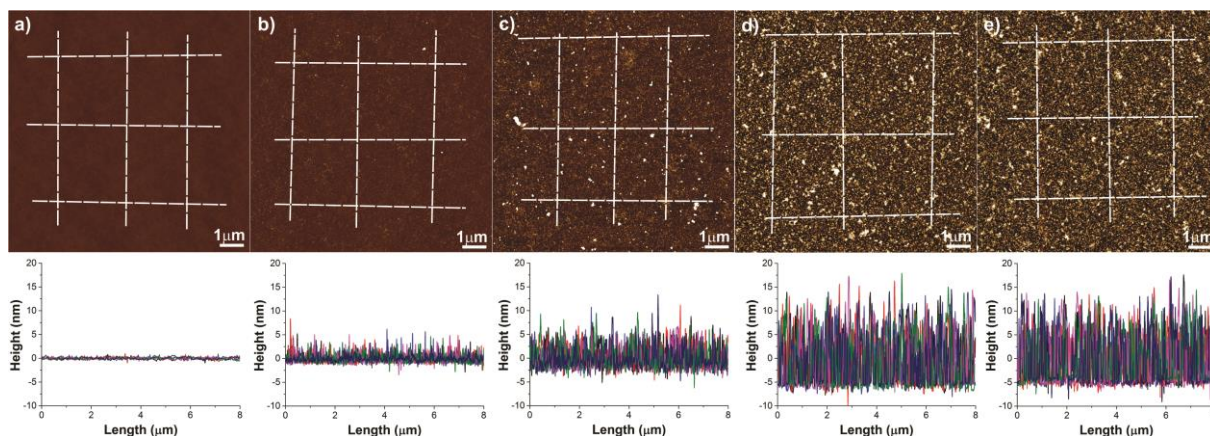

**Figure S5.** Tapping mode 3D AFM images of a microscopy glass coverslip (a) as used for the denpol-BAH-enzyme immobilization and images of immobilized *de*-PG2 (b), *de*-PG2-BAH-HRP (c), *de*-PG2-BAH-GOD (d), and *de*-PG2-BAH-(GOD,HRP) (e) on microscopy glass coverslips giving a large area for estimation of the homogeneity of the adsorbed layer. No large aggregates are visible on a several micrometer scale. The corresponding height profiles along the indicated white lines suggest a relatively homogeneous thickness of the adsorbed layers at this scale with a thickness corresponding to what is expected from the thickness of the individual conjugate chains observed on mica.
